# Supplementary material for: A convenient protocol for generating giant unilamellar vesicles containing SNARE proteins using electroformation
Source: Springer Nature journal article supplement (doi:10.1038/s41598-018-27456-4), 2018-06-15
Supplement: MOESM1 [file 41598_2018_27456_MOESM1_ESM.pdf]

## Supplementary Information

### A convenient protocol for generating giant unilamellar vesicles containing SNARE proteins using electroformation

Agata Witkowska<sup>1\*</sup>, Lukasz Jablonski<sup>1,2,3</sup>, and Reinhard Jahn<sup>1\*</sup>

<sup>1</sup>Department of Neurobiology, Max-Planck-Institute for Biophysical Chemistry, Göttingen, Germany

<sup>2</sup>Present address: Institute for Auditory Neuroscience, University Medical Center Göttingen, Göttingen, Germany

<sup>3</sup>Present address: Auditory Neuroscience and Optogenetics Laboratory, German Primate Center, Göttingen, Germany

\*to whom correspondence should be sent at:

Reinhard Jahn

e-mail: [rjahn@gwdg.de](mailto:rjahn@gwdg.de)

Agata Witkowska

e-mail: [agata.witkowska@wp.eu](mailto:agata.witkowska@wp.eu)

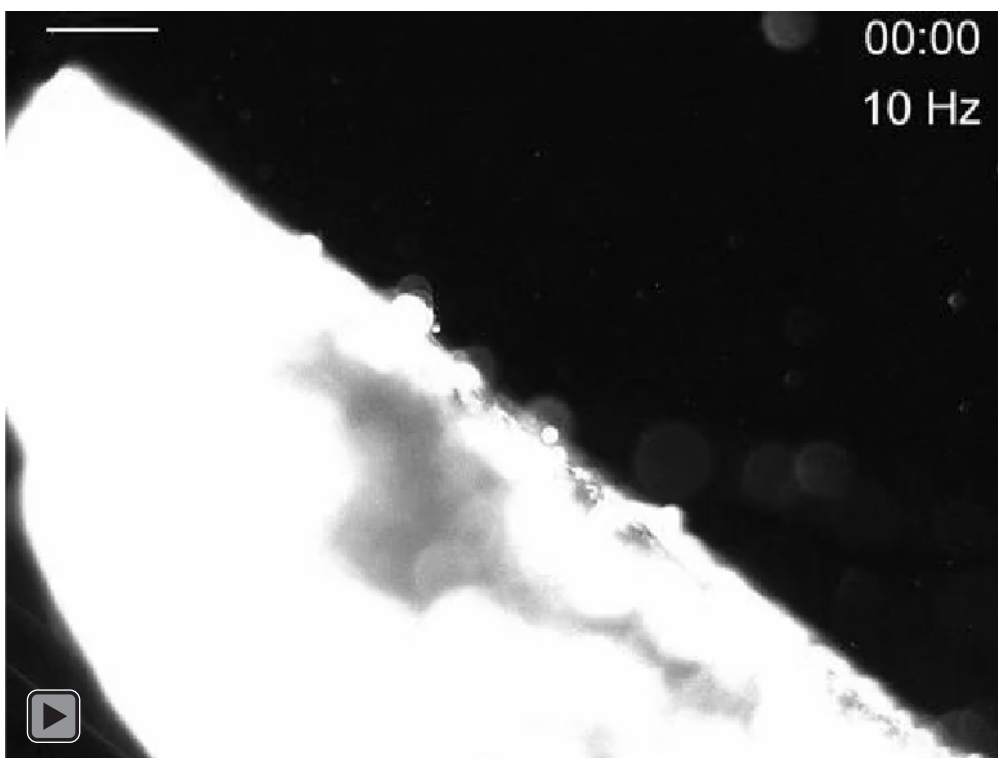

**Supplementary Video 1. Video illustrating GUV formation in a Pt chamber.** SNARE-GUVs (stained with DiO) forming during electroformation on Pt-wires. Time stamp (hours:minutes) and information about AC frequency are located in the top right corner. Scale bar (top left corner) 100  $\mu\text{m}$ . Video is speeded up 300 $\times$ .
